# Supplementary material
Source: publisher site journal article supplement (https://www.spandidos-publications.com/7693/downloadSupplementary)

Figure S1. Chemical structure and  $IC_{50}$  values of isoimperatorin. (A) Chemical structure of isoimperatorin is shown.  $IC_{50}$  value of isoimperatorin in (B) THP-1 cells and (C) AML-193 cells. Data are presented as the mean  $\pm$  SD. The  $IC_{50}$  values were calculated using nonlinear regression analysis.  $IC_{50}$ , half maximal inhibitory concentration.

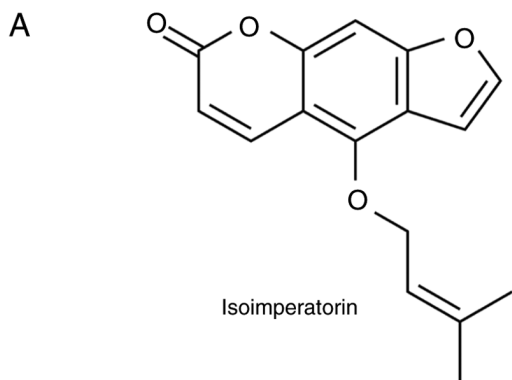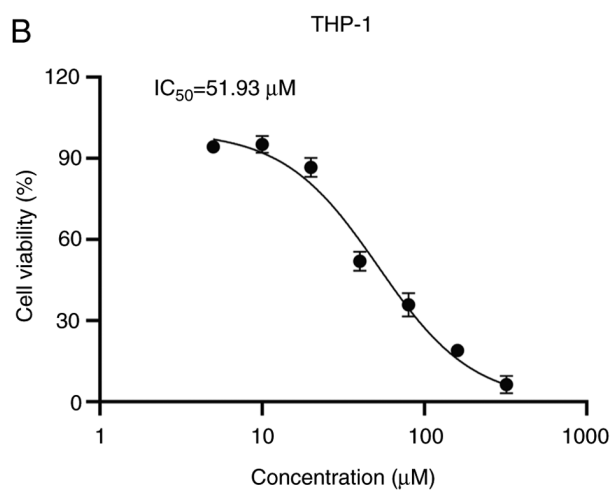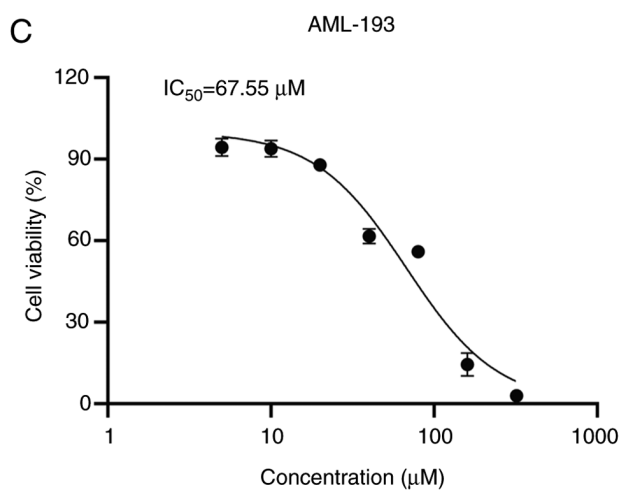

Figure S2. RT-qPCR analysis. RT-qPCR analysis was performed on two upregulated and downregulated selected genes in (A) ‘microRNAs in cancer’, (B) ‘prostate cancer’, (C) ‘small cell lung cancer’, (D) ‘proteoglycans in cancer processes’, (E) ‘glycosaminoglycan biosynthesis signaling pathway’, (F) ‘mucin type O-glycan biosynthesis signaling pathway’, (G) ‘steroid hormone biosynthesis signaling pathway’, (H) ‘glycosphingolipid biosynthesis pathway’, (I) ‘chemokine signaling pathway’, (J) ‘Th1 and Th2 cell differentiation’, (K) ‘NOD-like receptor signaling pathway’ and (L) ‘leukocyte transendothelial migration’ processes in AML-193 cells. Data are presented as the mean  $\pm$  SD. Significant differences were examined using unpaired two-tailed Student’s t-test. \* $P < 0.05$ , \*\* $P < 0.01$ , \*\*\* $P < 0.001$ . RT-qPCR, reverse transcription-quantitative PCR; C, control samples; and AML-193\_T represents AML-193 cells treated with 15  $\mu$ M isoimperatorin.

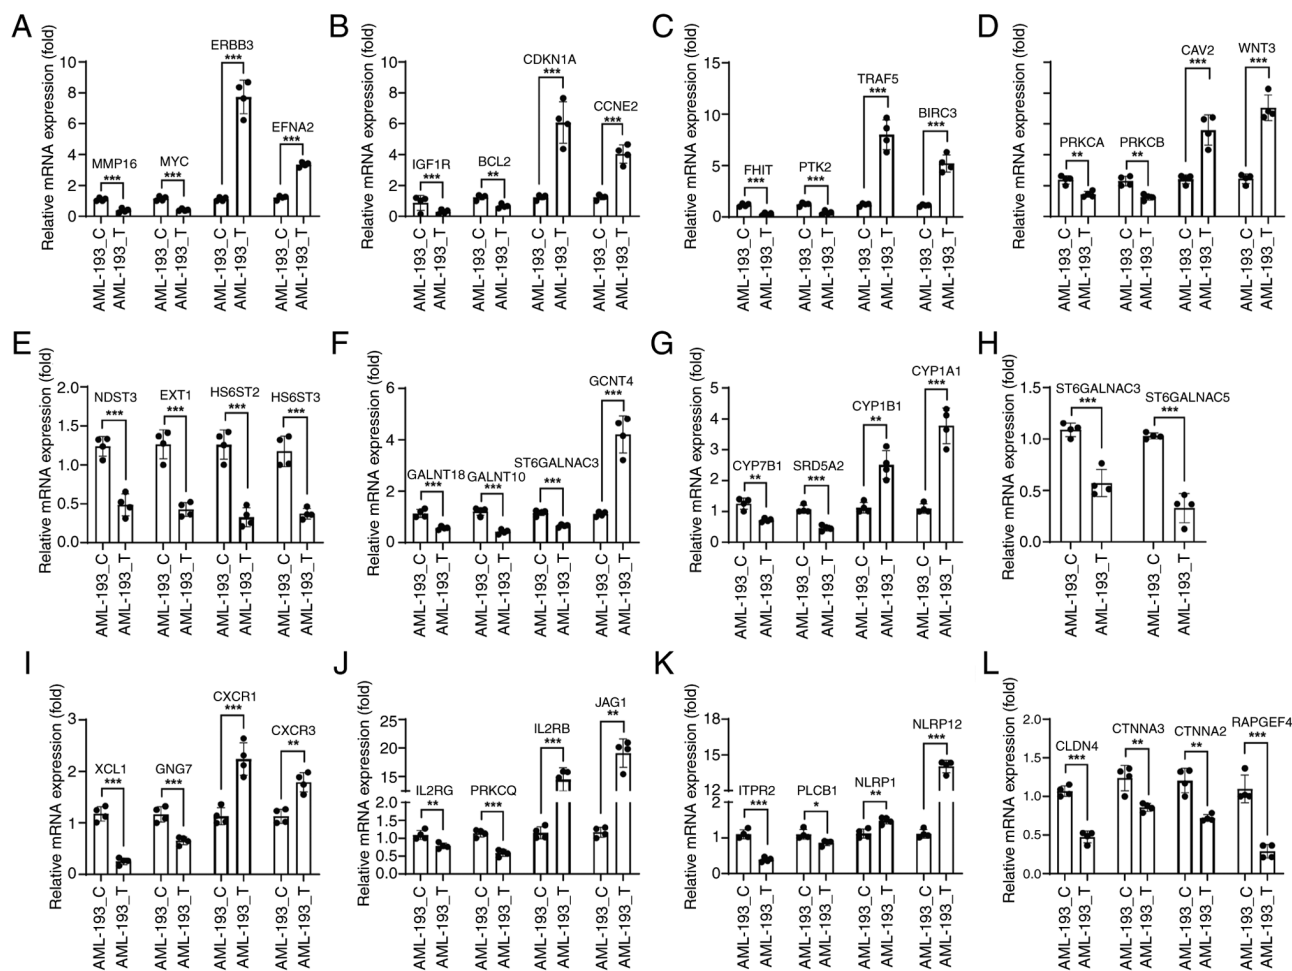

Supplement: Supplementary file 1 [file downloadSupplementary]
